# Supplementary material for: Direct design of active catalysts for low temperature oxidative coupling of methane via machine learning and data mining
Source: Royal Society of Chemistry journal article supplement (doi:10.1039/d0cy01751e), 2020-10-30
Supplement: d0cy01751e1.pdf [file d0cy01751e1.pdf]

*Supplementary Information*

**Direct Design of Active Catalysts for Low Temperature Oxidative Coupling of Methane via Machine Learning and Data Mining**

Junya Ohyama,<sup>\*a</sup> Takaaki Kinoshita,<sup>b</sup> Eri Funada,<sup>b</sup> Hiroshi Yoshida,<sup>a</sup> Masato Machida,<sup>a</sup> Shun Nishimura,<sup>c</sup> Takeaki Uno,<sup>d</sup> Jun Fujima,<sup>e</sup> Itsuki Miyazato,<sup>e</sup> Lauren Takahashi<sup>e</sup> and Keisuke Takahashi<sup>\*e</sup>

<sup>a</sup> Faculty of Advanced Science and Technology, Kumamoto University, 2-39-1 Kurokami, Chuo-ku, Kumamoto, 860-8555 Japan. E-mail: ohyama@kumamoto-u.ac.jp (J.O.)

<sup>b</sup> Address here. Graduate School of Science and Technology, Kumamoto University, 2-39-1 Kurokami, Chuo-ku, Kumamoto, 860-8555, Japan.

<sup>c</sup> Graduate School of Advanced Science and Technology, Japan Advanced Institute of Science and Technology (JAIST), 1-1 Asahidai, Nomi, 923-1292 Japan.

<sup>d</sup> National Institute of Informatics (NII), 2-1-2 Hitotsubashi, Chiyoda-ku, 101-8430 Japan.

<sup>e</sup> Department of Chemistry, Hokkaido University, N-15 W-8, Sapporo 060-0815, Japan. E-mail: keisuke.takahashi@eng.hokudai.ac.jp (K.T.)

**Table S1.** The results of OCM at 500-900 °C using the mono metal oxides and Mn-Na<sub>2</sub>WO<sub>4</sub>/SiO<sub>2</sub> in Fig. 2(a).

| Catalyst                        | Temp | CH <sub>4</sub><br>conv | O <sub>2</sub> conv | H <sub>2</sub> yield | CO yield | CO <sub>2</sub><br>yield | C <sub>2</sub> H <sub>4</sub><br>yield | C <sub>2</sub> H <sub>6</sub><br>yield | C <sub>2</sub> total |
|---------------------------------|------|-------------------------|---------------------|----------------------|----------|--------------------------|----------------------------------------|----------------------------------------|----------------------|
| La <sub>2</sub> O <sub>3</sub>  | 400  | 1                       | 1                   | 0                    | 0        | 0                        | 0                                      | 0                                      | 0                    |
|                                 | 500  | 2                       | 8                   | 0                    | 0        | 1                        | 0                                      | 0                                      | 0                    |
|                                 | 600  | 26                      | 89                  | 2                    | 6        | 9                        | 6                                      | 7                                      | 13                   |
|                                 | 700  | 27                      | 93                  | 3                    | 6        | 10                       | 8                                      | 6                                      | 14                   |
|                                 | 800  | 29                      | 98                  | 4                    | 6        | 11                       | 11                                     | 4                                      | 15                   |
| □                               | 900  | 30                      | 100                 | 6                    | 7        | 11                       | 12                                     | 1                                      | 14                   |
| CeO <sub>2</sub>                | 400  | 4                       | 12                  | 1                    | 0        | 2                        | 0                                      | 0                                      | 0                    |
|                                 | 500  | 17                      | 26                  | 1                    | 0        | 16                       | 0                                      | 0                                      | 0                    |
|                                 | 600  | 18                      | 81                  | 1                    | 0        | 16                       | 0                                      | 1                                      | 1                    |
|                                 | 700  | 18                      | 95                  | 2                    | 1        | 16                       | 0                                      | 1                                      | 1                    |
|                                 | 800  | 19                      | 98                  | 5                    | 5        | 15                       | 0                                      | 0                                      | 1                    |
| □                               | 900  | 24                      | 100                 | 11                   | 14       | 12                       | 1                                      | 0                                      | 1                    |
| Pr <sub>6</sub> O <sub>11</sub> | 400  | 1                       | 2                   | 0                    | 0        | 0                        | 0                                      | 0                                      | 0                    |
|                                 | 500  | 18                      | 99                  | 0                    | 0        | 16                       | 1                                      | 2                                      | 3                    |
|                                 | 600  | 20                      | 100                 | 0                    | 0        | 15                       | 1                                      | 3                                      | 4                    |
|                                 | 700  | 21                      | 100                 | 0                    | 0        | 15                       | 2                                      | 4                                      | 6                    |
|                                 | 800  | 22                      | 100                 | 1                    | 0        | 15                       | 3                                      | 5                                      | 8                    |
| □                               | 900  | 24                      | 100                 | 2                    | 2        | 14                       | 7                                      | 2                                      | 8                    |
| Nd <sub>2</sub> O <sub>3</sub>  | 400  | 1                       | 1                   | 0                    | 0        | 0                        | 0                                      | 0                                      | 0                    |
|                                 | 500  | 27                      | 95                  | 3                    | 4        | 11                       | 6                                      | 7                                      | 14                   |
|                                 | 600  | 29                      | 98                  | 2                    | 4        | 11                       | 8                                      | 8                                      | 16                   |
|                                 | 700  | 30                      | 100                 | 3                    | 4        | 12                       | 9                                      | 8                                      | 17                   |
|                                 | 800  | 30                      | 100                 | 4                    | 4        | 12                       | 10                                     | 5                                      | 16                   |
| □                               | 900  | 27                      | 100                 | 5                    | 5        | 12                       | 9                                      | 1                                      | 10                   |
| Sm <sub>2</sub> O <sub>3</sub>  | 400  | 1                       | 1                   | 0                    | 0        | 0                        | 0                                      | 0                                      | 0                    |
|                                 | 500  | 3                       | 11                  | 1                    | 0        | 2                        | 0                                      | 0                                      | 0                    |
|                                 | 600  | 27                      | 97                  | 4                    | 5        | 12                       | 6                                      | 7                                      | 12                   |
|                                 | 700  | 29                      | 99                  | 4                    | 5        | 12                       | 7                                      | 7                                      | 14                   |
|                                 | 800  | 30                      | 100                 | 4                    | 5        | 12                       | 10                                     | 6                                      | 16                   |
| □                               | 900  | 29                      | 100                 | 6                    | 6        | 12                       | 12                                     | 2                                      | 14                   |
| Eu <sub>2</sub> O <sub>3</sub>  | 400  | 1                       | 1                   | 0                    | 0        | 0                        | 0                                      | 0                                      | 0                    |
|                                 | 500  | 28                      | 98                  | 3                    | 5        | 12                       | 6                                      | 7                                      | 13                   |

|                                |     |    |     |   |    |    |    |   |    |
|--------------------------------|-----|----|-----|---|----|----|----|---|----|
|                                | 600 | 30 | 100 | 3 | 4  | 12 | 9  | 8 | 16 |
|                                | 700 | 30 | 100 | 3 | 4  | 12 | 9  | 8 | 17 |
|                                | 800 | 28 | 100 | 3 | 3  | 13 | 10 | 5 | 15 |
| □                              | 900 | 27 | 100 | 6 | 6  | 13 | 9  | 1 | 10 |
| <hr/>                          |     |    |     |   |    |    |    |   |    |
| Gd <sub>2</sub> O <sub>3</sub> | 400 | 1  | 0   | 0 | 0  | 0  | 0  | 0 | 0  |
|                                | 500 | 2  | 4   | 0 | 0  | 1  | 0  | 0 | 0  |
|                                | 600 | 16 | 58  | 5 | 6  | 7  | 1  | 3 | 5  |
|                                | 700 | 26 | 83  | 3 | 7  | 8  | 7  | 5 | 13 |
|                                | 800 | 29 | 96  | 4 | 7  | 10 | 11 | 4 | 15 |
| □                              | 900 | 28 | 99  | 5 | 7  | 11 | 11 | 1 | 12 |
| <hr/>                          |     |    |     |   |    |    |    |   |    |
| Y <sub>2</sub> O <sub>3</sub>  | 400 | 1  | 0   | 0 | 0  | 0  | 0  | 0 | 0  |
|                                | 500 | 1  | 2   | 0 | 1  | 0  | 0  | 0 | 0  |
|                                | 600 | 23 | 79  | 5 | 9  | 8  | 3  | 5 | 8  |
|                                | 700 | 29 | 95  | 5 | 8  | 10 | 9  | 5 | 14 |
|                                | 800 | 29 | 98  | 6 | 8  | 11 | 10 | 3 | 13 |
| □                              | 900 | 29 | 100 | 8 | 9  | 11 | 10 | 1 | 11 |
| <hr/>                          |     |    |     |   |    |    |    |   |    |
| Dy <sub>2</sub> O <sub>3</sub> | 400 | 0  | 0   | 0 | 0  | 0  | 0  | 0 | 0  |
|                                | 500 | 0  | 4   | 1 | 0  | 0  | 0  | 0 | 0  |
|                                | 600 | 21 | 86  | 6 | 7  | 11 | 2  | 4 | 6  |
|                                | 700 | 28 | 97  | 4 | 7  | 11 | 8  | 6 | 14 |
|                                | 800 | 29 | 99  | 4 | 6  | 11 | 11 | 5 | 16 |
| □                              | 900 | 29 | 100 | 6 | 7  | 11 | 12 | 1 | 13 |
| <hr/>                          |     |    |     |   |    |    |    |   |    |
| Yb <sub>2</sub> O <sub>3</sub> | 400 | -1 | -1  | 0 | 0  | 0  | 0  | 0 | 0  |
|                                | 500 | 0  | 3   | 0 | 0  | 0  | 0  | 0 | 0  |
|                                | 600 | 9  | 84  | 4 | 7  | 3  | 0  | 1 | 2  |
|                                | 700 | 29 | 97  | 3 | 8  | 9  | 10 | 6 | 16 |
|                                | 800 | 29 | 99  | 4 | 8  | 10 | 11 | 5 | 16 |
| □                              | 900 | 28 | 100 | 7 | 11 | 11 | 10 | 2 | 11 |
| <hr/>                          |     |    |     |   |    |    |    |   |    |
| MgO                            | 400 | 1  | 1   | 0 | 0  | 0  | 0  | 0 | 0  |
|                                | 500 | 1  | 1   | 0 | 0  | 0  | 0  | 0 | 0  |
|                                | 600 | 3  | 10  | 2 | 2  | 1  | 0  | 0 | 0  |
|                                | 700 | 9  | 30  | 3 | 6  | 2  | 1  | 1 | 2  |
|                                | 800 | 16 | 48  | 3 | 9  | 2  | 4  | 3 | 7  |
| □                              | 900 | 28 | 91  | 7 | 16 | 6  | 9  | 2 | 11 |
| <hr/>                          |     |    |     |   |    |    |    |   |    |
| Al <sub>2</sub> O <sub>3</sub> | 400 | 1  | 1   | 0 | 0  | 0  | 0  | 0 | 0  |
|                                | 500 | 1  | 2   | 0 | 0  | 0  | 0  | 0 | 0  |

|                                |     |    |     |   |    |    |    |   |    |
|--------------------------------|-----|----|-----|---|----|----|----|---|----|
|                                | 600 | 1  | 11  | 0 | 0  | 0  | 0  | 0 | 0  |
|                                | 700 | 1  | 29  | 0 | 0  | 0  | 0  | 0 | 0  |
|                                | 800 | 5  | 43  | 1 | 2  | 0  | 1  | 2 | 3  |
| □                              | 900 | 26 | 91  | 7 | 20 | 2  | 8  | 2 | 10 |
| ZnO                            | 400 | 1  | 1   | 0 | 0  | 0  | 0  | 0 | 0  |
|                                | 500 | 2  | 6   | 1 | 0  | 1  | 0  | 0 | 0  |
|                                | 600 | 19 | 89  | 0 | 0  | 14 | 2  | 5 | 7  |
|                                | 700 | 21 | 95  | 0 | 0  | 14 | 3  | 5 | 8  |
|                                | 800 | 21 | 96  | 1 | 1  | 14 | 3  | 4 | 7  |
| □                              | 900 | 25 | 88  | 5 | 10 | 8  | 9  | 2 | 10 |
| ZrO <sub>2</sub>               | 400 | 0  | 0   | 0 | 0  | 0  | 0  | 0 | 0  |
|                                | 500 | 0  | 1   | 0 | 0  | 0  | 0  | 0 | 0  |
|                                | 600 | 3  | 12  | 2 | 4  | 1  | 0  | 0 | 0  |
|                                | 700 | 26 | 100 | 4 | 10 | 10 | 6  | 4 | 11 |
|                                | 800 | 26 | 100 | 5 | 10 | 10 | 7  | 3 | 10 |
| □                              | 900 | 27 | 100 | 6 | 10 | 11 | 8  | 1 | 9  |
| Nb <sub>2</sub> O <sub>5</sub> | 400 | 2  | 2   | 0 | 0  | 0  | 0  | 0 | 0  |
|                                | 500 | 2  | 1   | 0 | 0  | 0  | 0  | 0 | 0  |
|                                | 600 | 2  | 2   | 0 | 0  | 0  | 0  | 0 | 0  |
|                                | 700 | 2  | 3   | 0 | 0  | 0  | 0  | 0 | 0  |
|                                | 800 | 10 | 22  | 1 | 6  | 0  | 2  | 2 | 4  |
| □                              | 900 | 24 | 95  | 3 | 25 | 1  | 3  | 1 | 3  |
| BaO                            | 400 | 1  | 0   | 0 | 0  | 0  | 0  | 0 | 0  |
|                                | 500 | 0  | 2   | 0 | 0  | 0  | 0  | 0 | 0  |
|                                | 600 | 1  | 16  | 0 | 0  | 0  | 0  | 0 | 0  |
|                                | 700 | 1  | 95  | 0 | 0  | 0  | 0  | 0 | 0  |
|                                | 800 | 8  | 99  | 1 | 3  | 1  | 2  | 2 | 4  |
| □                              | 900 | 30 | 99  | 7 | 10 | 9  | 12 | 1 | 14 |
| TiO <sub>2</sub>               | 400 | 1  | 1   | 0 | 0  | 0  | 0  | 0 | 0  |
|                                | 500 | 1  | 2   | 0 | 0  | 0  | 0  | 0 | 0  |
|                                | 600 | 3  | 12  | 1 | 3  | 0  | 0  | 0 | 0  |
|                                | 700 | 22 | 94  | 4 | 21 | 4  | 0  | 0 | 0  |
|                                | 800 | 22 | 100 | 4 | 22 | 4  | 0  | 0 | 1  |
| □                              | 900 | 24 | 100 | 5 | 22 | 4  | 2  | 1 | 3  |
| FeO                            | 400 | 2  | 2   | 0 | 0  | 0  | 0  | 0 | 0  |
|                                | 500 | 2  | 2   | 0 | 0  | 0  | 0  | 0 | 0  |

|                                    |     |    |    |   |    |    |    |   |    |
|------------------------------------|-----|----|----|---|----|----|----|---|----|
|                                    | 600 | 2  | 2  | 0 | 0  | 0  | 0  | 0 | 0  |
|                                    | 700 | 3  | 11 | 0 | 0  | 1  | 0  | 0 | 0  |
|                                    | 800 | 9  | 42 | 0 | 2  | 5  | 1  | 1 | 2  |
| □                                  | 900 | 25 | 79 | 6 | 17 | 3  | 7  | 2 | 9  |
| <hr/>                              |     |    |    |   |    |    |    |   |    |
| SnO                                | 400 | 1  | 1  | 0 | 0  | 0  | 0  | 0 | 0  |
|                                    | 500 | 1  | 3  | 0 | 0  | 0  | 0  | 0 | 0  |
|                                    | 600 | 4  | 20 | 0 | 0  | 3  | 0  | 0 | 0  |
|                                    | 700 | 17 | 96 | 0 | 0  | 15 | 0  | 2 | 2  |
|                                    | 800 | 19 | 99 | 0 | 0  | 15 | 1  | 3 | 4  |
| □                                  | 900 | 22 | 99 | 1 | 1  | 14 | 5  | 2 | 7  |
| <hr/>                              |     |    |    |   |    |    |    |   |    |
| Mn-Na <sub>2</sub> WO <sub>4</sub> | 400 | 1  | 1  | 0 | 0  | 0  | 0  | 0 | 0  |
| /SiO <sub>2</sub>                  | 500 | 1  | 1  | 0 | 0  | 0  | 0  | 0 | 0  |
|                                    | 600 | 1  | 1  | 0 | 0  | 0  | 0  | 0 | 0  |
|                                    | 700 | 2  | 5  | 0 | 0  | 0  | 0  | 0 | 0  |
|                                    | 800 | 23 | 69 | 3 | 11 | 3  | 9  | 3 | 12 |
|                                    | 900 | 33 | 99 | 3 | 10 | 6  | 16 | 2 | 18 |

**Table S2.** The results of OCM at 500-900 °C using 1wt% M/La<sub>2</sub>O<sub>3</sub> in Fig. 2(b). The loading of modifiers is 1wt%.

| Catalyst                          | Temp | CH <sub>4</sub><br>conv | O <sub>2</sub> conv | H <sub>2</sub> yield | CO yield | CO <sub>2</sub><br>yield | C <sub>2</sub> H <sub>4</sub><br>yield | C <sub>2</sub> H <sub>6</sub><br>yield | C <sub>2</sub> total |
|-----------------------------------|------|-------------------------|---------------------|----------------------|----------|--------------------------|----------------------------------------|----------------------------------------|----------------------|
| Li/La <sub>2</sub> O <sub>3</sub> | 400  | 1                       | 0                   | 0                    | 0        | 0                        | 0                                      | 0                                      | 0                    |
|                                   | 500  | 1                       | 0                   | 0                    | 0        | 0                        | 0                                      | 0                                      | 0                    |
|                                   | 600  | 1                       | 2                   | 0                    | 0        | 0                        | 0                                      | 0                                      | 0                    |
|                                   | 700  | 9                       | 22                  | 1                    | 1        | 2                        | 2                                      | 4                                      | 6                    |
|                                   | 800  | 29                      | 99                  | 3                    | 3        | 12                       | 10                                     | 5                                      | 16                   |
| □                                 | 900  | 28                      | 100                 | 5                    | 6        | 12                       | 10                                     | 2                                      | 12                   |
| Na/La <sub>2</sub> O <sub>3</sub> | 400  | 1                       | 0                   | 0                    | 0        | 0                        | 0                                      | 0                                      | 0                    |
|                                   | 500  | 1                       | 2                   | 0                    | 0        | 0                        | 0                                      | 0                                      | 0                    |
|                                   | 600  | 1                       | 3                   | 0                    | 0        | 1                        | 0                                      | 0                                      | 0                    |
|                                   | 700  | 29                      | 98                  | 3                    | 3        | 12                       | 9                                      | 7                                      | 17                   |
|                                   | 800  | 28                      | 100                 | 4                    | 4        | 13                       | 9                                      | 5                                      | 14                   |
| □                                 | 900  | 26                      | 100                 | 6                    | 7        | 12                       | 8                                      | 1                                      | 9                    |
| Mg/La <sub>2</sub> O <sub>3</sub> | 400  | 2                       | 2                   | 0                    | 0        | 0                        | 0                                      | 0                                      | 0                    |
|                                   | 500  | 22                      | 91                  | 0                    | 3        | 11                       | 3                                      | 5                                      | 8                    |
|                                   | 600  | 25                      | 96                  | 0                    | 4        | 11                       | 5                                      | 7                                      | 12                   |
|                                   | 700  | 28                      | 98                  | 2                    | 3        | 12                       | 8                                      | 7                                      | 15                   |
|                                   | 800  | 29                      | 100                 | 3                    | 3        | 12                       | 10                                     | 6                                      | 16                   |
| □                                 | 900  | 28                      | 100                 | 5                    | 4        | 12                       | 11                                     | 2                                      | 13                   |
| K/La <sub>2</sub> O <sub>3</sub>  | 400  | 1                       | 1                   | 0                    | 0        | 0                        | 0                                      | 0                                      | 0                    |
|                                   | 500  | 1                       | 1                   | 0                    | 0        | 0                        | 0                                      | 0                                      | 0                    |
|                                   | 600  | 2                       | 9                   | 1                    | 0        | 1                        | 0                                      | 0                                      | 0                    |
|                                   | 700  | 30                      | 100                 | 3                    | 3        | 13                       | 9                                      | 8                                      | 17                   |
|                                   | 800  | 30                      | 100                 | 4                    | 4        | 13                       | 10                                     | 6                                      | 16                   |
| □                                 | 900  | 27                      | 100                 | 5                    | 5        | 13                       | 10                                     | 2                                      | 12                   |
| Ca/La <sub>2</sub> O <sub>3</sub> | 400  | 1                       | 1                   | 0                    | 0        | 0                        | 0                                      | 0                                      | 0                    |
|                                   | 500  | 30                      | 97                  | 3                    | 4        | 11                       | 8                                      | 8                                      | 17                   |
|                                   | 600  | 30                      | 97                  | 3                    | 4        | 11                       | 8                                      | 8                                      | 16                   |
|                                   | 700  | 31                      | 98                  | 3                    | 4        | 11                       | 9                                      | 7                                      | 17                   |
|                                   | 800  | 31                      | 100                 | 4                    | 4        | 12                       | 11                                     | 6                                      | 17                   |
| □                                 | 900  | 30                      | 100                 | 6                    | 5        | 12                       | 12                                     | 1                                      | 14                   |
| V/La <sub>2</sub> O <sub>3</sub>  | 400  | 1                       | 0                   | 0                    | 0        | 0                        | 0                                      | 0                                      | 0                    |
|                                   | 500  | 1                       | 3                   | 0                    | 0        | 0                        | 0                                      | 0                                      | 0                    |

|                                   |     |    |     |    |    |    |   |   |    |
|-----------------------------------|-----|----|-----|----|----|----|---|---|----|
|                                   | 600 | 18 | 69  | 5  | 5  | 10 | 2 | 3 | 4  |
|                                   | 700 | 24 | 93  | 5  | 6  | 13 | 4 | 4 | 8  |
|                                   | 800 | 26 | 100 | 5  | 5  | 13 | 7 | 4 | 11 |
| □                                 | 900 | 26 | 100 | 6  | 7  | 13 | 8 | 1 | 8  |
| Cr/La <sub>2</sub> O <sub>3</sub> | 400 | 1  | 1   | 0  | 0  | 0  | 0 | 0 | 0  |
|                                   | 500 | 18 | 100 | 2  | 1  | 16 | 0 | 0 | 0  |
|                                   | 600 | 19 | 100 | 2  | 2  | 16 | 0 | 1 | 2  |
|                                   | 700 | 20 | 100 | 2  | 2  | 15 | 1 | 2 | 4  |
|                                   | 800 | 22 | 100 | 2  | 2  | 15 | 3 | 3 | 6  |
| □                                 | 900 | 23 | 100 | 4  | 3  | 14 | 5 | 1 | 6  |
| Mn/La <sub>2</sub> O <sub>3</sub> | 400 | 1  | 1   | 0  | 0  | 0  | 0 | 0 | 0  |
|                                   | 500 | 1  | 7   | 0  | 0  | 1  | 0 | 0 | 0  |
|                                   | 600 | 24 | 89  | 2  | 0  | 15 | 3 | 6 | 9  |
|                                   | 700 | 25 | 93  | 2  | 1  | 15 | 4 | 6 | 11 |
|                                   | 800 | 25 | 98  | 2  | 1  | 14 | 5 | 5 | 11 |
| □                                 | 900 | 25 | 100 | 4  | 4  | 14 | 7 | 1 | 8  |
| Fe/La <sub>2</sub> O <sub>3</sub> | 400 | 1  | 2   | 0  | 0  | 0  | 0 | 0 | 0  |
|                                   | 500 | 25 | 27  | 2  | 1  | 14 | 4 | 6 | 11 |
|                                   | 600 | 26 | 33  | 1  | 1  | 14 | 6 | 8 | 13 |
|                                   | 700 | 26 | 100 | 2  | 1  | 14 | 5 | 7 | 12 |
|                                   | 800 | 25 | 100 | 3  | 2  | 14 | 6 | 5 | 11 |
| □                                 | 900 | 24 | 100 | 5  | 5  | 13 | 6 | 1 | 8  |
| Co/La <sub>2</sub> O <sub>3</sub> | 400 | 1  | 2   | 0  | 0  | 0  | 0 | 0 | 0  |
|                                   | 500 | 18 | 100 | 1  | 1  | 16 | 0 | 2 | 2  |
|                                   | 600 | 19 | 100 | 1  | 1  | 16 | 1 | 2 | 3  |
|                                   | 700 | 18 | 100 | 1  | 1  | 16 | 1 | 2 | 3  |
|                                   | 800 | 19 | 100 | 1  | 1  | 15 | 1 | 2 | 3  |
| □                                 | 900 | 20 | 100 | 4  | 4  | 14 | 2 | 1 | 3  |
| Ni/La <sub>2</sub> O <sub>3</sub> | 400 | 1  | 1   | 0  | 0  | 0  | 0 | 0 | 0  |
|                                   | 500 | 27 | 100 | 16 | 9  | 18 | 0 | 2 | 2  |
|                                   | 600 | 38 | 100 | 0  | 33 | 13 | 0 | 1 | 1  |
|                                   | 700 | 50 | 100 | 0  | 57 | 6  | 0 | 0 | 0  |
|                                   | 800 | 60 | 100 | 0  | 75 | 1  | 0 | 0 | 0  |
| □                                 | 900 | 61 | 100 | 0  | 78 | 0  | 0 | 0 | 0  |
| Cu/La <sub>2</sub> O <sub>3</sub> | 400 | 1  | 2   | 0  | 0  | 0  | 0 | 0 | 0  |
|                                   | 500 | 18 | 100 | 1  | 0  | 16 | 0 | 1 | 1  |

|                                   |     |    |     |    |    |    |    |   |    |
|-----------------------------------|-----|----|-----|----|----|----|----|---|----|
|                                   | 600 | 18 | 100 | 1  | 0  | 16 | 0  | 1 | 1  |
|                                   | 700 | 18 | 100 | 1  | 1  | 16 | 0  | 1 | 2  |
|                                   | 800 | 20 | 100 | 3  | 2  | 15 | 1  | 2 | 4  |
| □                                 | 900 | 24 | 100 | 8  | 8  | 14 | 3  | 1 | 4  |
| Zn/La <sub>2</sub> O <sub>3</sub> | 400 | 1  | 1   | 0  | 0  | 0  | 0  | 0 | 0  |
|                                   | 500 | 29 | 96  | 4  | 4  | 12 | 7  | 8 | 15 |
|                                   | 600 | 30 | 98  | 4  | 4  | 12 | 8  | 8 | 16 |
|                                   | 700 | 30 | 98  | 3  | 4  | 12 | 9  | 7 | 17 |
|                                   | 800 | 31 | 100 | 4  | 4  | 12 | 10 | 6 | 16 |
| □                                 | 900 | 28 | 100 | 5  | 5  | 12 | 11 | 1 | 12 |
| Rb/La <sub>2</sub> O <sub>3</sub> | 400 | 1  | 0   | 0  | 0  | 0  | 0  | 0 | 0  |
|                                   | 500 | 1  | 3   | 0  | 0  | 0  | 0  | 0 | 0  |
|                                   | 600 | 20 | 68  | 3  | 3  | 8  | 5  | 5 | 10 |
|                                   | 700 | 28 | 96  | 4  | 4  | 12 | 8  | 6 | 14 |
|                                   | 800 | 30 | 100 | 5  | 4  | 13 | 11 | 5 | 16 |
| □                                 | 900 | 30 | 100 | 8  | 7  | 12 | 13 | 1 | 14 |
| Sr/La <sub>2</sub> O <sub>3</sub> | 400 | 1  | 1   | 0  | 0  | 0  | 0  | 0 | 0  |
|                                   | 500 | 30 | 97  | 3  | 3  | 12 | 9  | 9 | 17 |
|                                   | 600 | 29 | 96  | 3  | 3  | 12 | 8  | 8 | 16 |
|                                   | 700 | 30 | 98  | 3  | 3  | 12 | 10 | 8 | 17 |
|                                   | 800 | 31 | 100 | 4  | 3  | 12 | 12 | 6 | 18 |
| □                                 | 900 | 30 | 100 | 6  | 5  | 12 | 13 | 1 | 15 |
| Mo/La <sub>2</sub> O <sub>3</sub> | 400 | 1  | 1   | 0  | 0  | 0  | 0  | 0 | 0  |
|                                   | 500 | 23 | 89  | 2  | 5  | 11 | 4  | 5 | 9  |
|                                   | 600 | 23 | 98  | 2  | 5  | 12 | 3  | 5 | 8  |
|                                   | 700 | 24 | 100 | 2  | 5  | 13 | 4  | 5 | 9  |
|                                   | 800 | 27 | 100 | 3  | 5  | 12 | 7  | 5 | 13 |
| □                                 | 900 | 27 | 100 | 6  | 6  | 12 | 10 | 1 | 11 |
| Pd/La <sub>2</sub> O <sub>3</sub> | 400 | 18 | 100 | 2  | 4  | 15 | 0  | 0 | 0  |
|                                   | 500 | 20 | 100 | 6  | 7  | 14 | 0  | 0 | 0  |
|                                   | 600 | 23 | 100 | 10 | 11 | 14 | 0  | 0 | 0  |
|                                   | 700 | 28 | 100 | 17 | 18 | 13 | 0  | 0 | 0  |
|                                   | 800 | 28 | 100 | 16 | 20 | 12 | 0  | 0 | 0  |
| □                                 | 900 | 37 | 100 | 0  | 37 | 8  | 0  | 0 | 1  |
| Ag/La <sub>2</sub> O <sub>3</sub> | 400 | 1  | 2   | 0  | 0  | 0  | 0  | 0 | 0  |
|                                   | 500 | 23 | 29  | 0  | 0  | 15 | 3  | 6 | 9  |



|                                   |     |    |     |   |   |    |    |   |    |
|-----------------------------------|-----|----|-----|---|---|----|----|---|----|
|                                   | 600 | 26 | 72  | 1 | 1 | 14 | 6  | 7 | 14 |
|                                   | 700 | 28 | 96  | 2 | 2 | 13 | 8  | 8 | 15 |
|                                   | 800 | 28 | 100 | 3 | 3 | 13 | 9  | 6 | 15 |
| □                                 | 900 | 27 | 100 | 5 | 5 | 13 | 10 | 2 | 12 |
| In/La <sub>2</sub> O <sub>3</sub> | 400 | 1  | 1   | 0 | 0 | 0  | 0  | 0 | 0  |
|                                   | 500 | 25 | 87  | 1 | 3 | 11 | 6  | 7 | 14 |
|                                   | 600 | 27 | 99  | 1 | 1 | 13 | 8  | 8 | 15 |
|                                   | 700 | 27 | 99  | 1 | 1 | 13 | 8  | 7 | 15 |
|                                   | 800 | 28 | 100 | 1 | 1 | 13 | 9  | 6 | 15 |
| □                                 | 900 | 27 | 100 | 4 | 2 | 13 | 11 | 2 | 13 |
| Sn/La <sub>2</sub> O <sub>3</sub> | 400 | 1  | 0   | 0 | 0 | 0  | 0  | 0 | 0  |
|                                   | 500 | 1  | 86  | 0 | 0 | 0  | 0  | 0 | 0  |
|                                   | 600 | 9  | 97  | 3 | 4 | 4  | 0  | 1 | 2  |
|                                   | 700 | 23 | 100 | 1 | 3 | 11 | 4  | 5 | 9  |
|                                   | 800 | 27 | 100 | 1 | 3 | 12 | 9  | 5 | 14 |
| □                                 | 900 | 28 | 100 | 4 | 5 | 12 | 12 | 1 | 14 |
| Cs/La <sub>2</sub> O <sub>3</sub> | 400 | 1  | 1   | 0 | 0 | 0  | 0  | 0 | 0  |
|                                   | 500 | 2  | 5   | 1 | 0 | 1  | 0  | 0 | 0  |
|                                   | 600 | 20 | 74  | 4 | 4 | 10 | 3  | 4 | 7  |
|                                   | 700 | 29 | 98  | 4 | 4 | 13 | 8  | 7 | 14 |
|                                   | 800 | 30 | 100 | 5 | 4 | 13 | 11 | 5 | 16 |
| □                                 | 900 | 30 | 100 | 8 | 7 | 12 | 13 | 1 | 14 |
| Ba/La <sub>2</sub> O <sub>3</sub> | 400 | 1  | 1   | 0 | 0 | 0  | 0  | 0 | 0  |
|                                   | 500 | 20 | 17  | 3 | 2 | 9  | 4  | 6 | 10 |
|                                   | 600 | 27 | 28  | 2 | 3 | 12 | 7  | 8 | 15 |
|                                   | 700 | 29 | 39  | 3 | 3 | 12 | 9  | 8 | 17 |
|                                   | 800 | 31 | 99  | 4 | 3 | 13 | 12 | 6 | 18 |
| □                                 | 900 | 29 | 100 | 7 | 6 | 13 | 12 | 2 | 13 |
| W/La <sub>2</sub> O <sub>3</sub>  | 400 | 1  | 1   | 0 | 0 | 0  | 0  | 0 | 0  |
|                                   | 500 | 20 | 72  | 3 | 5 | 8  | 4  | 5 | 9  |
|                                   | 600 | 26 | 91  | 4 | 6 | 11 | 6  | 6 | 12 |
|                                   | 700 | 27 | 95  | 5 | 5 | 12 | 6  | 6 | 12 |
|                                   | 800 | 30 | 99  | 5 | 5 | 12 | 11 | 5 | 16 |
| □                                 | 900 | 30 | 100 | 7 | 7 | 12 | 13 | 1 | 14 |
| Re/La <sub>2</sub> O <sub>3</sub> | 400 | 1  | 1   | 0 | 0 | 0  | 0  | 0 | 0  |
|                                   | 500 | 18 | 100 | 2 | 3 | 15 | 0  | 1 | 2  |

|                                   |     |    |     |    |    |    |   |   |   |
|-----------------------------------|-----|----|-----|----|----|----|---|---|---|
|                                   | 600 | 18 | 100 | 2  | 2  | 15 | 0 | 1 | 2 |
|                                   | 700 | 20 | 100 | 2  | 2  | 15 | 1 | 3 | 4 |
|                                   | 800 | 24 | 99  | 3  | 3  | 14 | 3 | 3 | 6 |
| □                                 | 900 | 25 | 100 | 6  | 7  | 13 | 7 | 1 | 8 |
| <hr/>                             |     |    |     |    |    |    |   |   |   |
| Pt/La <sub>2</sub> O <sub>3</sub> | 400 | 1  | 1   | 0  | 0  | 0  | 0 | 0 | 0 |
|                                   | 500 | 1  | 2   | 0  | 0  | 0  | 0 | 0 | 0 |
|                                   | 600 | 19 | 100 | 2  | 2  | 15 | 0 | 2 | 2 |
|                                   | 700 | 21 | 100 | 3  | 4  | 14 | 0 | 4 | 4 |
|                                   | 800 | 25 | 100 | 8  | 9  | 14 | 1 | 3 | 4 |
| □                                 | 900 | 28 | 100 | 14 | 17 | 12 | 3 | 1 | 3 |
| <hr/>                             |     |    |     |    |    |    |   |   |   |

**Table S3.** The results of OCM at 500-900 °C using 1 wt% In modified rare earth oxides, 0.5-0.01wt% In/La<sub>2</sub>O<sub>3</sub>, 0.1wt% In/Nd<sub>2</sub>O<sub>3</sub>, and 0.1wt% In/Eu<sub>2</sub>O<sub>3</sub> in Fig. 2(c).

| Catalyst                           | Temp | CH <sub>4</sub><br>conv | O <sub>2</sub> conv | H <sub>2</sub> yield | CO yield | CO <sub>2</sub><br>yield | C <sub>2</sub> H <sub>4</sub><br>yield | C <sub>2</sub> H <sub>6</sub><br>yield | C <sub>2</sub> total |
|------------------------------------|------|-------------------------|---------------------|----------------------|----------|--------------------------|----------------------------------------|----------------------------------------|----------------------|
| In/CeO <sub>2</sub>                | 400  | 16                      | 100                 | 0                    | 0        | 16                       | 0                                      | 0                                      | 0                    |
|                                    | 500  | 17                      | 98                  | 0                    | 0        | 16                       | 0                                      | 0                                      | 0                    |
|                                    | 600  | 17                      | 99                  | 1                    | 0        | 16                       | 0                                      | 0                                      | 0                    |
|                                    | 700  | 18                      | 100                 | 3                    | 2        | 16                       | 0                                      | 1                                      | 1                    |
|                                    | 800  | 20                      | 100                 | 6                    | 6        | 15                       | 0                                      | 0                                      | 1                    |
| □                                  | 900  | 26                      | 100                 | 13                   | 17       | 12                       | 1                                      | 0                                      | 1                    |
| In/Pr <sub>6</sub> O <sub>11</sub> | 400  | 1                       | 3                   | 0                    | 0        | 0                        | 0                                      | 0                                      | 0                    |
|                                    | 500  | 19                      | 100                 | 0                    | 0        | 16                       | 1                                      | 3                                      | 3                    |
|                                    | 600  | 18                      | 100                 | 0                    | 0        | 16                       | 1                                      | 2                                      | 3                    |
|                                    | 700  | 19                      | 100                 | 0                    | 0        | 16                       | 1                                      | 3                                      | 4                    |
|                                    | 800  | 20                      | 100                 | 0                    | 0        | 15                       | 2                                      | 3                                      | 5                    |
| □                                  | 900  | 22                      | 100                 | 2                    | 1        | 15                       | 5                                      | 1                                      | 6                    |
| In/Nd <sub>2</sub> O <sub>3</sub>  | 400  | 1                       | 1                   | 0                    | 0        | 0                        | 0                                      | 0                                      | 0                    |
|                                    | 500  | 27                      | 99                  | 1                    | 1        | 13                       | 6                                      | 8                                      | 14                   |
|                                    | 600  | 25                      | 99                  | 2                    | 2        | 14                       | 5                                      | 7                                      | 11                   |
|                                    | 700  | 27                      | 100                 | 1                    | 1        | 13                       | 7                                      | 8                                      | 14                   |
|                                    | 800  | 28                      | 100                 | 2                    | 1        | 13                       | 9                                      | 6                                      | 15                   |
| □                                  | 900  | 26                      | 100                 | 3                    | 2        | 13                       | 9                                      | 2                                      | 11                   |
| In/Eu <sub>2</sub> O <sub>3</sub>  | 400  | 1                       | 1                   | 0                    | 0        | 0                        | 0                                      | 0                                      | 0                    |
|                                    | 500  | 26                      | 98                  | 1                    | 3        | 13                       | 5                                      | 7                                      | 12                   |
|                                    | 600  | 27                      | 97                  | 1                    | 2        | 13                       | 7                                      | 8                                      | 14                   |
|                                    | 700  | 27                      | 100                 | 1                    | 1        | 14                       | 7                                      | 7                                      | 15                   |
|                                    | 800  | 26                      | 100                 | 1                    | 1        | 14                       | 8                                      | 5                                      | 13                   |
| □                                  | 900  | 25                      | 100                 | 4                    | 4        | 13                       | 8                                      | 1                                      | 9                    |
| In/Sm <sub>2</sub> O <sub>3</sub>  | 400  | 1                       | 1                   | 0                    | 0        | 0                        | 0                                      | 0                                      | 0                    |
|                                    | 500  | 27                      | 98                  | 1                    | 2        | 13                       | 6                                      | 8                                      | 14                   |
|                                    | 600  | 26                      | 97                  | 1                    | 2        | 12                       | 6                                      | 7                                      | 13                   |
|                                    | 700  | 27                      | 100                 | 1                    | 2        | 13                       | 7                                      | 8                                      | 14                   |
|                                    | 800  | 27                      | 100                 | 1                    | 1        | 13                       | 9                                      | 6                                      | 15                   |
| □                                  | 900  | 27                      | 100                 | 4                    | 3        | 13                       | 11                                     | 2                                      | 12                   |
| In/Gd <sub>2</sub> O <sub>3</sub>  | 400  | 1                       | 1                   | 0                    | 0        | 0                        | 0                                      | 0                                      | 0                    |
|                                    | 500  | 20                      | 83                  | 1                    | 3        | 11                       | 4                                      | 5                                      | 8                    |

|                                   |     |    |     |   |   |    |    |   |    |
|-----------------------------------|-----|----|-----|---|---|----|----|---|----|
|                                   | 600 | 25 | 96  | 1 | 2 | 12 | 6  | 7 | 12 |
|                                   | 700 | 25 | 100 | 1 | 1 | 13 | 7  | 7 | 14 |
|                                   | 800 | 26 | 100 | 1 | 1 | 13 | 7  | 6 | 13 |
| □                                 | 900 | 24 | 100 | 2 | 2 | 14 | 8  | 2 | 10 |
| In/Dy <sub>2</sub> O <sub>3</sub> | 400 | 0  | 0   | 0 | 0 | 0  | 0  | 0 | 0  |
|                                   | 500 | 2  | 8   | 0 | 0 | 1  | 0  | 0 | 0  |
|                                   | 600 | 22 | 87  | 1 | 2 | 11 | 4  | 6 | 10 |
|                                   | 700 | 24 | 98  | 0 | 1 | 14 | 5  | 7 | 11 |
|                                   | 800 | 25 | 100 | 1 | 1 | 14 | 6  | 6 | 12 |
| □                                 | 900 | 24 | 100 | 2 | 2 | 13 | 8  | 2 | 10 |
| In/Y <sub>2</sub> O <sub>3</sub>  | 400 | 1  | 1   | 0 | 0 | 0  | 0  | 0 | 0  |
|                                   | 500 | 19 | 83  | 1 | 3 | 11 | 2  | 4 | 6  |
|                                   | 600 | 24 | 96  | 1 | 2 | 13 | 5  | 6 | 11 |
|                                   | 700 | 25 | 100 | 1 | 1 | 13 | 6  | 7 | 13 |
|                                   | 800 | 26 | 100 | 1 | 1 | 13 | 8  | 6 | 14 |
| □                                 | 900 | 26 | 100 | 3 | 3 | 13 | 9  | 1 | 11 |
| In/Yb <sub>2</sub> O <sub>3</sub> | 400 | -1 | 0   | 0 | 0 | 0  | 0  | 0 | 0  |
|                                   | 500 | 0  | 1   | 0 | 0 | 0  | 0  | 0 | 0  |
|                                   | 600 | 14 | 57  | 0 | 2 | 7  | 2  | 3 | 6  |
|                                   | 700 | 21 | 87  | 0 | 1 | 12 | 5  | 5 | 10 |
|                                   | 800 | 22 | 96  | 1 | 1 | 13 | 5  | 5 | 10 |
| □                                 | 900 | 22 | 99  | 2 | 2 | 14 | 7  | 2 | 8  |
| 0.5wt%                            |     |    |     |   |   |    |    |   |    |
| In/La <sub>2</sub> O <sub>3</sub> | 400 | 1  | 2   | 0 | 0 | 0  | 0  | 0 | 0  |
|                                   | 500 | 26 | 89  | 1 | 2 | 11 | 6  | 7 | 14 |
|                                   | 600 | 27 | 95  | 1 | 2 | 12 | 7  | 8 | 15 |
|                                   | 700 | 27 | 100 | 1 | 1 | 13 | 8  | 7 | 15 |
|                                   | 800 | 27 | 100 | 2 | 1 | 13 | 8  | 6 | 14 |
| □                                 | 900 | 26 | 100 | 4 | 3 | 13 | 9  | 2 | 11 |
| 0.1wt%                            |     |    |     |   |   |    |    |   |    |
| In/La <sub>2</sub> O <sub>3</sub> | 400 | 1  | 1   | 0 | 0 | 0  | 0  | 0 | 0  |
|                                   | 500 | 29 | 96  | 3 | 4 | 11 | 8  | 8 | 17 |
|                                   | 600 | 30 | 98  | 3 | 4 | 12 | 9  | 8 | 18 |
|                                   | 700 | 30 | 99  | 3 | 3 | 12 | 10 | 8 | 18 |
|                                   | 800 | 30 | 100 | 3 | 3 | 12 | 10 | 6 | 17 |
| □                                 | 900 | 28 | 100 | 5 | 4 | 13 | 11 | 2 | 13 |

|                                              |     |     |     |     |   |    |    |    |    |
|----------------------------------------------|-----|-----|-----|-----|---|----|----|----|----|
| 0.01wt%<br>In/La <sub>2</sub> O <sub>3</sub> | 400 | 2   | 1   | 0   | 0 | 0  | 0  | 0  | 0  |
|                                              | 500 | 3   | 8   | 1   | 1 | 1  | 0  | 0  | 0  |
|                                              | 600 | 28  | 92  | 3   | 4 | 11 | 8  | 8  | 15 |
|                                              | 700 | 29  | 98  | 3   | 4 | 12 | 9  | 7  | 16 |
|                                              | 800 | 29  | 100 | 4   | 4 | 13 | 10 | 6  | 16 |
|                                              | □   | 900 | 28  | 100 | 6 | 5  | 13 | 10 | 2  |
| <hr/>                                        |     |     |     |     |   |    |    |    |    |
| 0.1wt%<br>In/Nd <sub>2</sub> O <sub>3</sub>  | 400 | 1   | 1   | 0   | 0 | 0  | 0  | 0  | 0  |
|                                              | 500 | 27  | 98  | 2   | 3 | 12 | 6  | 7  | 13 |
|                                              | 600 | 28  | 99  | 2   | 3 | 13 | 6  | 7  | 14 |
|                                              | 700 | 29  | 100 | 2   | 2 | 13 | 8  | 8  | 15 |
|                                              | 800 | 29  | 100 | 2   | 2 | 13 | 10 | 6  | 16 |
|                                              | □   | 900 | 28  | 100 | 4 | 3  | 13 | 12 | 2  |
| <hr/>                                        |     |     |     |     |   |    |    |    |    |
| 0.1wt%<br>In/Eu <sub>2</sub> O <sub>3</sub>  | 400 | 1   | 1   | 0   | 0 | 0  | 0  | 0  | 0  |
|                                              | 500 | 27  | 99  | 3   | 4 | 12 | 6  | 7  | 12 |
|                                              | 600 | 27  | 99  | 4   | 4 | 13 | 5  | 7  | 12 |
|                                              | 700 | 29  | 100 | 3   | 4 | 12 | 7  | 7  | 14 |
|                                              | 800 | 29  | 100 | 3   | 3 | 12 | 10 | 6  | 16 |
|                                              | □   | 900 | 29  | 100 | 7 | 7  | 12 | 12 | 1  |

**Table S4.** The results of OCM at 500-900 °C using the predicted catalysts in Fig. 5. The loading of modifiers is 1wt%.

| Catalyst                         | Temp | CH <sub>4</sub><br>conv | O <sub>2</sub> conv | H <sub>2</sub> yield | CO yield | CO <sub>2</sub><br>yield | C <sub>2</sub> H <sub>4</sub><br>yield | C <sub>2</sub> H <sub>6</sub><br>yield | C <sub>2</sub> total |
|----------------------------------|------|-------------------------|---------------------|----------------------|----------|--------------------------|----------------------------------------|----------------------------------------|----------------------|
| Al/Y <sub>2</sub> O <sub>3</sub> | 400  | 1                       | 1                   | 0                    | 0        | 0                        | 0                                      | 0                                      | 0                    |
|                                  | 500  | 18                      | 74                  | 6                    | 7        | 10                       | 1                                      | 2                                      | 3                    |
|                                  | 600  | 22                      | 82                  | 7                    | 9        | 10                       | 2                                      | 3                                      | 5                    |
|                                  | 700  | 24                      | 87                  | 6                    | 10       | 9                        | 4                                      | 4                                      | 8                    |
|                                  | 800  | 28                      | 96                  | 5                    | 7        | 11                       | 9                                      | 4                                      | 13                   |
| □                                | 900  | 28                      | 100                 | 6                    | 8        | 11                       | 10                                     | 2                                      | 12                   |
| Ca/Y <sub>2</sub> O <sub>3</sub> | 400  | 1                       | 0                   | 0                    | 0        | 0                        | 0                                      | 0                                      | 0                    |
|                                  | 500  | 1                       | 2                   | 0                    | 0        | 0                        | 0                                      | 0                                      | 0                    |
|                                  | 600  | 4                       | 60                  | 2                    | 2        | 1                        | 0                                      | 0                                      | 0                    |
|                                  | 700  | 31                      | 93                  | 4                    | 5        | 11                       | 11                                     | 7                                      | 18                   |
|                                  | 800  | 31                      | 98                  | 4                    | 5        | 12                       | 12                                     | 6                                      | 18                   |
| □                                | 900  | 30                      | 100                 | 6                    | 6        | 12                       | 13                                     | 2                                      | 15                   |
| Ni/Y <sub>2</sub> O <sub>3</sub> | 400  | 1                       | 1                   | 0                    | 0        | 0                        | 0                                      | 0                                      | 0                    |
|                                  | 500  | 35                      | 99                  | 0                    | 27       | 14                       | 0                                      | 0                                      | 0                    |
|                                  | 600  | 44                      | 100                 | 0                    | 45       | 9                        | 0                                      | 0                                      | 0                    |
|                                  | 700  | 54                      | 100                 | 0                    | 65       | 4                        | 0                                      | 0                                      | 0                    |
|                                  | 800  | 60                      | 100                 | 0                    | 75       | 1                        | 0                                      | 0                                      | 0                    |
| □                                | 900  | 61                      | 100                 | 0                    | 77       | 0                        | 0                                      | 0                                      | 0                    |
| Zn/Y <sub>2</sub> O <sub>3</sub> | 400  | 15                      | 89                  | 0                    | 0        | 14                       | 0                                      | 0                                      | 0                    |
|                                  | 500  | 16                      | 98                  | 0                    | 0        | 16                       | 0                                      | 0                                      | 0                    |
|                                  | 600  | 17                      | 100                 | 0                    | 0        | 16                       | 0                                      | 0                                      | 0                    |
|                                  | 700  | 17                      | 100                 | 0                    | 0        | 16                       | 0                                      | 1                                      | 1                    |
|                                  | 800  | 18                      | 100                 | 0                    | 0        | 16                       | 0                                      | 2                                      | 2                    |
| □                                | 900  | 1                       | 1                   | 0                    | 0        | 0                        | 0                                      | 0                                      | 0                    |
| Ag/Y <sub>2</sub> O <sub>3</sub> | 400  | 1                       | 3                   | 0                    | 0        | 2                        | 0                                      | 0                                      | 0                    |
|                                  | 500  | 16                      | 31                  | 0                    | 0        | 15                       | 0                                      | 2                                      | 2                    |
|                                  | 600  | 21                      | 89                  | 0                    | 0        | 15                       | 2                                      | 4                                      | 6                    |
|                                  | 700  | 24                      | 96                  | 1                    | 0        | 14                       | 5                                      | 6                                      | 11                   |
|                                  | 800  | 27                      | 98                  | 2                    | 2        | 13                       | 8                                      | 5                                      | 14                   |
| □                                | 900  | 29                      | 100                 | 5                    | 6        | 12                       | 11                                     | 2                                      | 13                   |

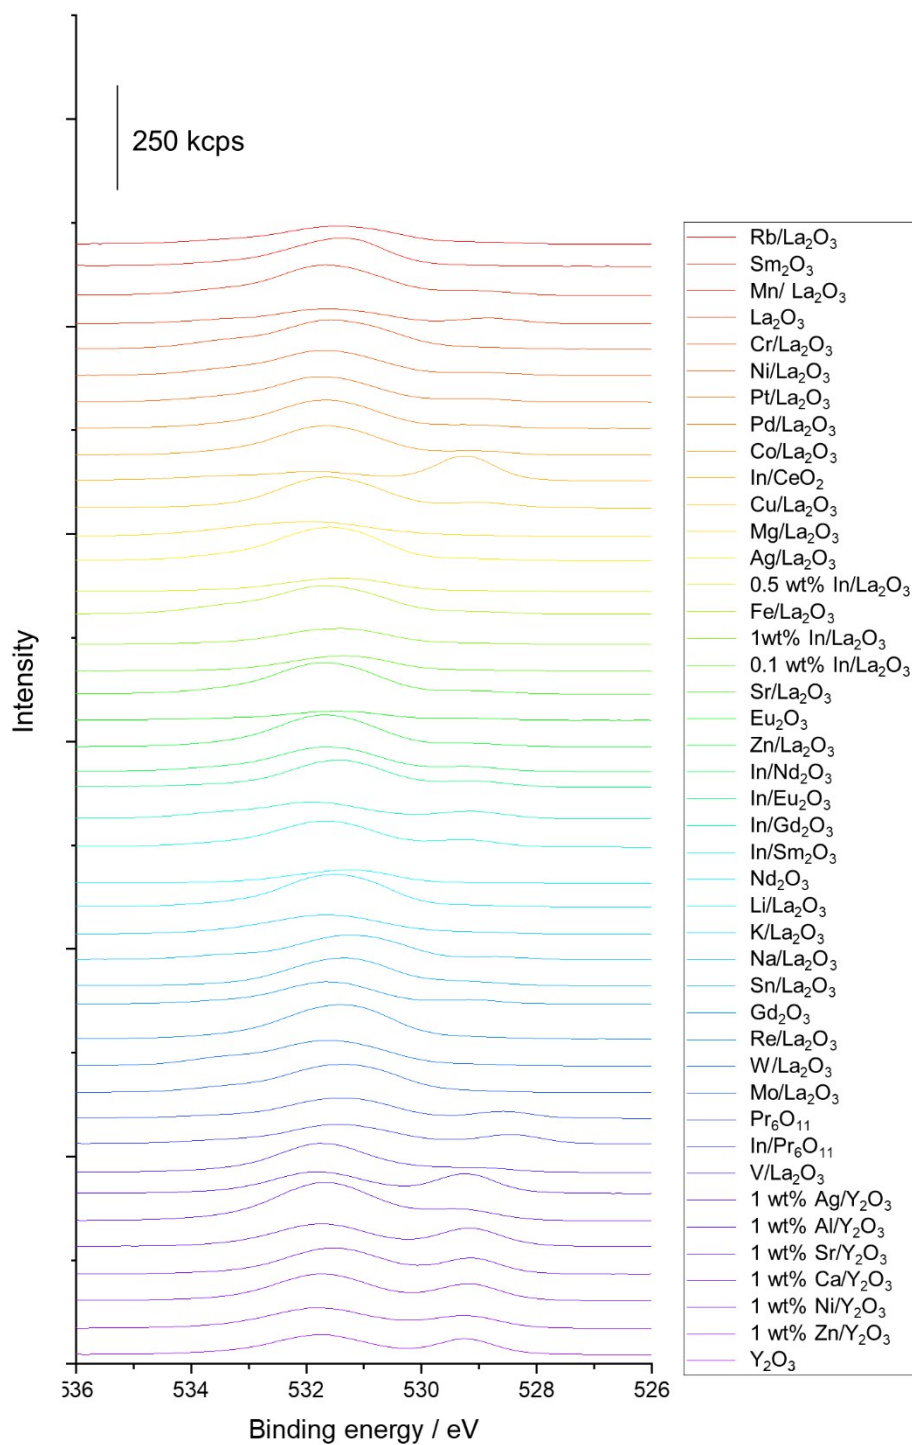

**Figure S1.** O 1s XPS of the catalysts analyzed.

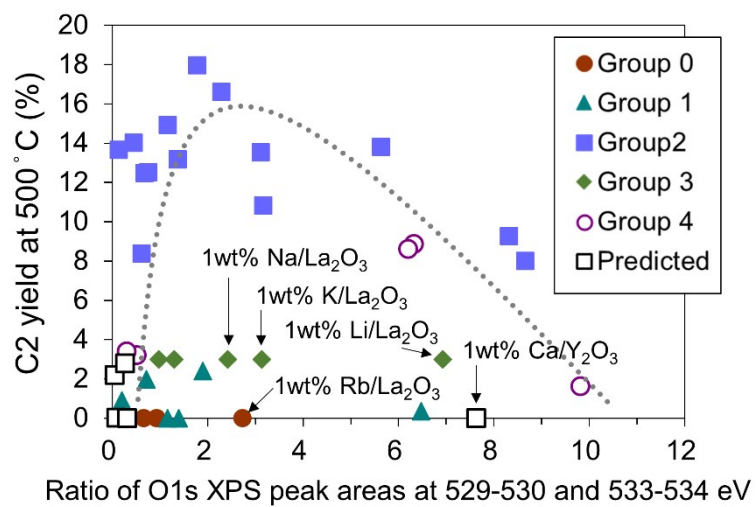

**Figure S2.** Dependence of the C2 yield at 500 °C on the ratio of O1s XPS peak areas at 529-530 and 533-534 eV of the catalysts. Group 0: ●, Group 1: ▲, Group 2: ■, Group 3: ◆, Group 4: ○, Predicted: □.



**Table S5.** Compounds used in this work.

| Compound                                                                             | Supplier                     |
|--------------------------------------------------------------------------------------|------------------------------|
| LiNO <sub>3</sub>                                                                    | FUJIFILM Wako Pure Chemical  |
| NaNO <sub>3</sub>                                                                    | FUJIFILM Wako Pure Chemical  |
| Mg(NO <sub>3</sub> ) <sub>2</sub> · 6H <sub>2</sub> O                                | FUJIFILM Wako Pure Chemical  |
| KNO <sub>3</sub>                                                                     | FUJIFILM Wako Pure Chemical  |
| Ca(NO <sub>3</sub> ) <sub>2</sub> · 4H <sub>2</sub> O                                | FUJIFILM Wako Pure Chemical  |
| NH <sub>4</sub> VO <sub>3</sub>                                                      | FUJIFILM Wako Pure Chemical  |
| Cr(NO <sub>3</sub> ) <sub>2</sub> · 9H <sub>2</sub> O,                               | Sigma-Aldrich                |
| Mn(NO <sub>3</sub> ) <sub>2</sub> · 6H <sub>2</sub> O                                | FUJIFILM Wako Pure Chemical  |
| Fe(NO <sub>3</sub> ) <sub>3</sub> · 9H <sub>2</sub> O                                | FUJIFILM Wako Pure Chemical  |
| Co(NO <sub>3</sub> ) <sub>2</sub> · 6H <sub>2</sub> O                                | FUJIFILM Wako Pure Chemical  |
| Ni(NO <sub>3</sub> ) <sub>2</sub> · 6H <sub>2</sub> O                                | FUJIFILM Wako Pure Chemical  |
| Cu(NO <sub>3</sub> ) <sub>2</sub> · 2H <sub>2</sub> O                                | FUJIFILM Wako Pure Chemical  |
| Zn(NO <sub>3</sub> ) <sub>2</sub> · 6H <sub>2</sub> O                                | Kishida Chemical             |
| RbNO <sub>3</sub>                                                                    | FUJIFILM Wako Pure Chemical  |
| Sr(NO <sub>3</sub> ) <sub>2</sub> · 6H <sub>2</sub> O                                | FUJIFILM Wako Pure Chemical  |
| (NH <sub>4</sub> ) <sub>6</sub> Mo <sub>7</sub> O <sub>24</sub> · 4H <sub>2</sub> O  | FUJIFILM Wako Pure Chemical  |
| Pd(NO <sub>3</sub> ) <sub>2</sub>                                                    | FUJIFILM Wako Pure Chemical  |
| AgNO <sub>3</sub>                                                                    | FUJIFILM Wako Pure Chemical  |
| In(NO <sub>3</sub> ) <sub>3</sub> · 3H <sub>2</sub> O                                | FUJIFILM Wako Pure Chemical  |
| SnCl <sub>2</sub> · 2H <sub>2</sub> O                                                | NACALAI TESQUE               |
| CsNO <sub>3</sub>                                                                    | FUJIFILM Wako Pure Chemical  |
| Ba(NO <sub>3</sub> ) <sub>2</sub>                                                    | FUJIFILM Wako Pure Chemical  |
| (NH <sub>4</sub> ) <sub>10</sub> W <sub>12</sub> O <sub>41</sub> · 5H <sub>2</sub> O | Kishida Chemical             |
| NH <sub>4</sub> ReO <sub>4</sub>                                                     | FUJIFILM Wako Pure Chemical  |
| Pt(NO <sub>3</sub> ) <sub>2</sub> · (NH <sub>3</sub> ) <sub>2</sub>                  | Tanaka Kikinzoku Kogyo       |
| Y <sub>2</sub> O <sub>3</sub>                                                        | Kishida Chemical             |
| La <sub>2</sub> O <sub>3</sub>                                                       | Kishida Chemical             |
| CeO <sub>2</sub>                                                                     | DAIICHI KIGENSO KAGAKU KOGYO |
| Pr <sub>6</sub> O <sub>11</sub>                                                      | FUJIFILM Wako Pure Chemical  |
| Nd <sub>2</sub> O <sub>3</sub>                                                       | Kishida Chemical             |
| Sm <sub>2</sub> O <sub>3</sub>                                                       | Kishida Chemical             |
| Eu <sub>2</sub> O <sub>3</sub>                                                       | FUJIFILM Wako Pure Chemical  |
| Gd <sub>2</sub> O <sub>3</sub>                                                       | Kishida Chemical             |
| Dy <sub>2</sub> O <sub>3</sub>                                                       | FUJIFILM Wako Pure Chemical  |

|                                                    |                             |
|----------------------------------------------------|-----------------------------|
| Yb <sub>2</sub> O <sub>3</sub>                     | FUJIFILM Wako Pure Chemical |
| αAl <sub>2</sub> O <sub>3</sub>                    | FUJIFILM Wako Pure Chemical |
| BaO                                                | FUJIFILM Wako Pure Chemical |
| ZnO                                                | FUJIFILM Wako Pure Chemical |
| ZrO <sub>2</sub>                                   | Kojundo Chemical Lab.       |
| Nb <sub>2</sub> O <sub>5</sub>                     | FUJIFILM Wako Pure Chemical |
| TiO <sub>2</sub> (JRC-TIO-6)                       | Catalysis Society of Japan  |
| FeO                                                | FUJIFILM Wako Pure Chemical |
| SnO                                                | FUJIFILM Wako Pure Chemical |
| SiO <sub>2</sub> (60N)                             | Kanto Chemical              |
| Na <sub>2</sub> WO <sub>4</sub> ·2H <sub>2</sub> O | Sigma-Aldrich               |

---
